# Supplementary material for: Genetic Signature of Anthropogenic Population Collapse in Orang-utans
Source: PLOS journal article supplement (doi:10.1371/journal.pbio.0040025), 2006-01-17
Supplement: S4 (10.1371/journal.pbio.0040025.s004) [file journal.pbio.0040025.s004]

##### Table S4

| S2 (lin.) | log(**) | log(*r*) | log(*tf*) | range | thinning | steps | iterations |
| --- | --- | --- | --- | --- | --- | --- | --- |
| Run_01 | 100 | 1000 | 10 | 10-5-105 | 5 105 | 2 104 | 1010 |
| Run_02 | 1 | 10 | 1000 | 10-5-105 | 106 | 5 104 | 5 1010 |
| Run_03 | 10 | 10 | 10 | 10-5-105 | 5 105 | 2 104 | 1010 |
| Run_04 | 10 | 100 | 100 | 10-5-105 | 5 105 | 2 104 | 1010 |
| Run 05 | 100 | 1 | 10 | 10-5-105 | 5 105 | 2 104 | 1010 |
